# Supplementary material for: SLIT/ROBO2 Signaling Promotes Mammary Stem Cell Senescence by Inhibiting Wnt Signaling
Source: PubMed Central journal article supplement — Stem Cell Reports. 2014 Aug 28;3(3):385–93. doi: 10.1016/j.stemcr.2014.07.007 (PMC4266005; doi:10.1016/j.stemcr.2014.07.007), 2014-08-28
Supplement: mmc1.pdf [file mmc1.pdf]

**Stem Cell Reports, Volume 3**

**Supplemental Information**

**SLIT/ROBO2 Signaling Promotes Mammary Stem Cell  
Senescence by Inhibiting Wnt Signaling**

**Gwyndolen Harburg, Jennifer Compton, Wei Liu, Naomi Iwai, Shahrzad Zada, Rebecca  
Marlow, Phyllis Strickland, Yi Ariel Zeng, and Lindsay Hinck**

## **MG Transplantation**

Mammary anlage were rescued and tissue fragments from resulting outgrowths were transplanted (Strickland et al., 2006). *Robo2* cells sorted by FACS were manually counted and transplanted at limiting dilution (Shackleton et al., 2006).

## **IHC and SA- $\beta$ -Gal Activity**

IHC was performed as previously described with: anti-SMA (Sigma), anti-P16<sup>INK4a</sup> and anti-p63 (Santa Cruz Biotech), anti-*Robo2* (Abcam), and anti-ABC (Millipore) (Marlow et al., 2010). SA- $\beta$ -Gal activity was detected as previously described (Debacq-Chainiaux et al., 2009). Fluorescent imaging was performed on a Biorevo BZ-9000 Digital Microscope (Keyence), and confocal imaging on a Velocity Spinning Disk Confocal (PerkinElmer).

## **Cell Preparation, Cell Sorting, and Primary Cell Culture**

Cell suspensions for FACS and primary cultures were prepared as described (Shackleton et al., 2006; Vaillant et al., 2008; Zeng and Nusse, 2010). All BC colony 3D Matrigel cultures were generated from FACS-purified BCs. Cultures were treated daily with WNT3A, DKK, (Zeng and Nusse, 2010) or LY294002 (Sigma), or every three days with SLIT2 (Macias et al., 2011). FACS was performed using a FACS Aria (BD Biosciences). Matrigel (BD Biosciences) cultures were fixed with 10% formalin and dehydrated with 70% ethanol prior to paraffin embedding.

## **RNA Extraction, and q-RT-PCR**

Total RNA was isolated using TRIzol (Invitrogen), and then prepared as previously described (Macias et al., 2011). q-RT-PCR was performed using a Bio-rad CFX Connect Real-Time System (Bio-rad) and LightCycler 480 SYBR Green I Master (Roche). Gene expression was determined using CFX Manager software (Biorad). Primers used for q-RT-PCR were: Robo1-F TTATGGTGATGTGGACCTTAGTA, Robo1-R GGTTGTATGGGATGGTTGGAG, Robo2-F CATGGGATTTGGTTATTCGCTAC, Robo2-R GGACCCGATCTTCGTCTTCTT, Myc-F TCTCCATCCTATGTTGCGGTC, Myc-R TCCAAGTAACTCGGTCAT, Jun-F ACTCGGACCTTCTCACGTC, Jun-R GGTCGGTGTAGTGGTGATGT, Tert-F TCTACCGCACTTTGGTTGCC, Tert-R CAGCACGTTTCTCTCGTTGC, P16-F TTTGTGTACCGCTGGGAAC, P16-R TAGCTCTGCTGTTGGGATTG, GAPDH-F CATGGCCTTCCGTGTTTCCTA, GAPDH-R CCTGCTTCACCACCTTCTTGAT.

## **Supplemental References**

Debacq-Chainiaux, F., Erusalimsky, J.D., Campisi, J., and Toussaint, O. (2009). Protocols to detect senescence-associated beta-galactosidase (SA-beta-gal) activity, a biomarker of senescent cells in culture and in vivo. *Nat Protoc* 4, 1798-1806.

Macias, H., Moran, A., Samara, Y., Moreno, M., Compton, J.E., Harburg, G., Strickland, P., and Hinck, L. (2011). SLIT/ROBO1 signaling suppresses mammary branching morphogenesis by limiting basal cell number. *Developmental cell* 20, 827-840.

Marlow, R., Binnewies, M., Sorensen, L.K., Monica, S.D., Strickland, P., Forsberg, E.C., Li, D.Y., and Hinck, L. (2010). Vascular Robo4 restricts proangiogenic VEGF signaling in breast. *Proc Natl Acad Sci U S A* *107*, 10520-10525.

Shackleton, M., Vaillant, F., Simpson, K.J., Stingl, J., Smyth, G.K., Asselin-Labat, M.L., Wu, L., Lindeman, G.J., and Visvader, J.E. (2006). Generation of a functional mammary gland from a single stem cell. *Nature* *439*, 84-88.

Strickland, P., Shin, G.C., Plump, A., Tessier-Lavigne, M., and Hinck, L. (2006). Slit2 and netrin 1 act synergistically as adhesive cues to generate tubular bi-layers during ductal morphogenesis. *Development* *133*, 823-832.

Vaillant, F., Asselin-Labat, M.L., Shackleton, M., Forrest, N.C., Lindeman, G.J., and Visvader, J.E. (2008). The mammary progenitor marker CD61/beta3 integrin identifies cancer stem cells in mouse models of mammary tumorigenesis. *Cancer Res* *68*, 7711-7717.

Zeng, Y.A., and Nusse, R. (2010). Wnt proteins are self-renewal factors for mammary stem cells and promote their long-term expansion in culture. *Cell Stem Cell* *6*, 568-577.
